# Supplementary material
Source: PubMed Central journal article supplement (PMC6946073)
Supplement: CJN.05610519SupplementaryData.pdf [file CJN.05610519SupplementaryData.pdf]

*Supplemental material is neither peer-reviewed nor thoroughly edited by CJASN. The authors alone are responsible for the accuracy and presentation of the material.*

**Supplemental Materials for "Alterations of proximal tubular secretion in autosomal dominant polycystic kidney disease"**

Ke Wang MD, Leila R. Zelnick PhD, Yan Chen MS, Andrew Hoofnagle MD PhD, Terry Watnick MD, Stephen Seliger MD, Bryan Kestenbaum MD MS

**Supplemental Material Table of Contents**

Supplemental Methods

Supplemental Table 1. Analyte and internal standard vendors and solid phase extraction used for urine.

Supplemental Table 2. Internal standards.

Supplemental Table 3. Chromatographic parameters.

Supplemental Table 4. Chromatographic program

Supplemental Table 5. Mass Spectrometric Parameters (Part 1).

Supplemental Table 6. Mass Spectrometric Parameters (Part 2).

Supplemental Table 7. Mass Spectrometric Parameters (Part 3).

Supplemental Table 8. Pamoic acid internal NMR standard integrals and assignments.

Supplemental Table 9. Limits of quantification for each analyte.

Supplemental Table 10. Recoveries in different matrices.

Supplemental Table 11. Detection limits, laboratory variability and characteristics of candidate secretory solutes.

Supplemental Table 12. Serum or plasma solute concentrations by cohort.

Supplemental Table 13. Urine concentrations by cohort.

*Supplemental material is neither peer-reviewed nor thoroughly edited by C/ASN. The authors alone are responsible for the accuracy and presentation of the material.*

## **Supplemental Methods:**

### **Detailed description of laboratory techniques**

**Solute extraction from plasma and serum.** Analytes were extracted from plasma or serum by protein precipitation in organic solvent. In a 96-well Acroprep Advance filter plate (Pall PN: 8148), 100  $\mu$ L of sample, 10  $\mu$ L of internal standard mix, and 300  $\mu$ L acetonitrile (ACN)/1% formic acid were combined. The plate was sealed (Pall Cap Mat PN: 5230) and vigorously agitated with a multitube vortexer (10 min on maximum speed). The plate was then spun down for 10 min at 1,509 $g$  and the filtrate collected in a new 96-well collection plate (Grainger PN: 786201). The filtrate was then passed through a phospholipid removal plate (Phenomenex PN: 8E-S133-TGB) using a positive pressure manifold (Biotage, Pressure+96). The resulting sample was captured in a lower volume 96-well plate (Grainger PN: 651201) and dried down in a centrifugal vacuum evaporator overnight.

**Solute extraction from urine.** Analytes were extracted from urine by two different solid phase extractions (*see Supplemental Table 1* for which analytes were extracted by each solid phase). In a 96-well plate (Grainger PN: 780270), 20  $\mu$ L sample, 10  $\mu$ L internal standard, and 870  $\mu$ L formic acid diluent were mixed and then added to either a mixed cation exchange extraction plate or a hydrophilic-lipophilic binding extraction plate (Waters MCX PN: 186000248 with 2% formic acid in water as the diluent and HLB PN: WAT058951 with 0.2% formic acid in water as the diluent). Using the positive pressure manifold (Biotage, Pressure+96), the plates were washed with 1 mL diluent and the analytes were eluted (HLB elution: 1 mL of 60% acetonitrile, 40% methanol, MCX elution: twice with 600  $\mu$ L of 60% acetonitrile, 40% methanol + 5% ammonium hydroxide) into a new 96-well plate (Grainger PN: 780270). The eluent was dried down in a centrifugal vacuum overnight.

**Internal standard mix.** All internal standards were combined in a single tube and the volume brought to 20 mL with methanol. The concentration of each analyte in the internal standard mix is listed in **Supplemental Table 2**.

**Liquid chromatography-tandem mass spectrometry.** Dried extracts were reconstituted in 80  $\mu$ L of 5% acetonitrile/0.2% formic acid in water and filtered through a large-pore filter plate (Millipore, MSBVN1210) to remove particulates. A volume of 20  $\mu$ L or 5  $\mu$ L (for plasma/serum and urine, respectively) was injected onto a Restek PFPP chromatographic column (50 mm x 2.1 mm Pinnacle DB PFPP 1.9  $\mu$ m Restek PN: 9419252), which was developed using a gradient (Shimadzu Nexera XR 20A, **Supplemental Tables 3 and 4**). The column eluate was introduced into a triple quadrupole tandem mass spectrometer (Sciex 6500, **Supplemental Tables 5-7**). Data was collected by a combination of scheduled (53 sec window around the retention times listed in **Supplemental Tables 5 and 7**) and unscheduled MRMs (**Supplemental Table 5-7**). Endogenous peak areas (determined in Skyline) were normalized to internal standard peak areas (peak area ratio). To reduce run-to-run variability, all peak area ratios for study samples were normalized to the average peak area ratio observed in 5 replicates of a matrix-matched single point calibrator processed in each batch and for each study sample the resulting ratio was multiplied by the concentration of each analyte in the single point calibrator. To monitor process quality, two matrix-matched quality control samples were processed in parallel in each batch.

### **Assignment of single point calibrator concentrations using quantitative NMR and standard addition**

**Quantitative NMR.** Non-isotopically labeled analytes were dissolved in D<sub>2</sub>O (p-cresol sulfate) or d<sub>6</sub>-DMSO (all others) and analyzed by proton (<sup>1</sup>H) NMR on a AV-300 (Bruker). The instrument was calibrated against a Bruker certified pamoic acid standard (100 mg/ml pamoic acid in d<sub>6</sub>-DMSO + 1% TMS, Part no. Z10298). Samples were auto-tuned and matched and shimmed with a software script to ensure consistent measurement conditions. <sup>1</sup>H

*Supplemental material is neither peer-reviewed nor thoroughly edited by CJASN. The authors alone are responsible for the accuracy and presentation of the material.*

NMR peaks of pamoic acid that were integrated and assigned to stoichiometric counts of  $^1\text{H}$  are shown in **Supplemental Table 8**.  $^1\text{H}$  NMR data were collected under identical conditions. Clean peaks that did not exhibit overlap with adjacent peaks and that did not have interference from solvent and other buffer peaks were chosen for assignment. These peaks were unambiguously assigned to respective  $^1\text{H}$  atoms of the molecule using established protocol of small molecule resonance assignment by multiplet and chemical shift analysis as well as ab-initio simulation of  $^1\text{H}$  spectra from the known structures of the molecules. Both the above steps were carried out using Topspin 3.5 (Bruker) and MestReNova 12.0.1 (Mestrelab Research S.L.) software. The integrated areas of the assigned peaks were then computed and compared with the pamoic acid standard integrals as internal references and the effective concentration was determined using the ERETIC2 protocol from within the Topspin 3.5 software [PMID: 25215441]. Cinnamoylglycine required the higher resolution of an AV700 system. The same stocks measured by NMR were then spiked into the plasma and urine single point calibrators and used by standard addition to assign the concentration of each analyte in the single point calibrators.

**Standard addition.** Concentration of analytes was initially estimated by comparing peak areas of internal standards of known concentration, to peak areas of unknown endogenous analytes. Each matrix-matched single point calibrator (**SPC**) was spiked with 3% (serum) or 5% (urine) analyte stock solution (in DMSO) to a final concentration of approximately 30-fold (serum) or 10-fold (urine) higher than the estimated concentration of endogenous analyte in each SPC. Analyte mixes and spiked SPC were prepared in singlicate and extracted in triplicate on three independent days. Endogenous analyte concentration was calculated by multiplying the peak area ratio of the SPC (with 3% or 5% blank DMSO for serum or urine, respectively) by the slope of the linear regression of concentration vs. peak area ratio (2-4 data points for each curve, spanning the linear portion of the spike-recovery experiment).

**Limits of quantification and linearity.** Upper limit of quantification (**ULOQ**) was defined as the highest concentration in the standard addition experiment that demonstrated a linear response across the three days. Lower limit of quantitation (**LLOQ**) was determined by diluting single point calibrator into negative matrix and extracting in triplicate. LLOQ was determined to be the lowest concentration at which the recovery was between 80-120% and the within-day CV% of the measurement was <20%. Plasma samples were diluted into either MSG3000 (Golden West Diagnostics), 30% bovine serum albumin (Sigma) in phosphate buffered saline, or saline [data shown is for the most relevant matrix that lacked isobaric interference]. Urine samples were diluted into water (**Supplemental Table 9**).

**Interference.** SPC, hemolyzed, lipemic, high-protein (7 g/dL), and low-protein samples (<3 g/dL) were each spiked to a final concentration 3-fold higher than the approximate endogenous concentration of each analyte and percent recoveries were calculated (SPC was assumed to be 100% recovery for each). Interference was defined by a recovery outside the range of 75-125% of expected. Hemolysis interfered with trimethyluric acid recovery. High total protein interfered with the recovery of 3-hydroxy hippurate and isovalerylglycine. Lipemia and low total protein did not interfere with any analyte recoveries (**Supplemental Table 10**).

**Precision.** To assess the variability of the analysis, three different pools of human plasma or urine were analyzed in five replicates on each of five days. Total imprecision was determined using the sum of squares approach:  $\text{Total \%CV} = \sqrt{(\text{between day \%CV})^2 + (\text{within-day \%CV})^2}$ . The total %CV for each of the three samples was then averaged (**Supplemental Table 11**).

Supplemental material is neither peer-reviewed nor thoroughly edited by CJASN. The authors alone are responsible for the accuracy and presentation of the material.

**Supplemental Table 1.** Analyte and internal standard vendors and solid phase extraction used for urine.

| Compound (endogenous) | Vendor                                 | Compound (IS)                                            | Vendor                                   | SPE for urine |
|-----------------------|----------------------------------------|----------------------------------------------------------|------------------------------------------|---------------|
| 3-Hydroxy hippurate   | Toronto Research Chemicals PN: H943125 |                                                          |                                          | MCX           |
| Adipic acid           | Sigma PN: 09582-50G                    | Adipic acid ( $^{13}\text{C}_6$ )                        | Cambridge Isotopes PN: CLM-4723-0.1      | MCX           |
| Cinnamoylglycine      | Sigma PN: S658200-25MG                 | Cinnamoylglycine ( $^2\text{H}_2$ )                      | Medical Isotopes PN: D32615              | MCX           |
| Dimethyluric acid     | Toronto Research Chemicals PN: D479695 | Dimethyluric acid ( $^{13}\text{C}_4,^{15}\text{N}_3$ )  | Sigma PN: 705640                         | MCX           |
| Hippurate             | Sigma PN: 112003-5G                    | Hippuric acid ( $^2\text{H}_5$ )                         | Toronto Research Chemicals PN: H356702   | MCX           |
| Indoxyl sulfate       | Sigma PN: 13875-250MG                  | Indoxyl sulfate ( $^{13}\text{C}_6$ )                    | Sigma PN: 809780-1MG                     | MCX           |
| Isovalerylglycine     | Toronto Research Chemicals PN: I917600 | Isovalerylglycine ( $^2\text{H}_2$ )                     | CDN Isotopes PN: D-6230                  | MCX           |
| Kynurenic acid        | Sigma PN: K3375-250MG                  | Kynurenic acid ( $^2\text{H}_5$ )                        | Toronto Research Chemicals PN: K660502   | HLB           |
| Pantothenic acid      | Sigma PN: 21210-5G-F                   |                                                          |                                          | HLB           |
| p-cresol-sulfate      | Collaborator Provided                  | p-Cresol sulfate ( $^2\text{H}_7$ )                      | Collaborator Provided                    | MCX           |
| Pyridoxic acid        | Sigma PN: P9630-25MG                   | Pyridoxic acid ( $^2\text{H}_3$ )                        | Toronto Research Chemicals PN: P991877   | MCX           |
| Suberic acid          | Sigma PN: 60930-100G                   |                                                          |                                          | MCX           |
| Succinic acid         | Sigma PN: S3674-100G                   | Succinic acid ( $^{13}\text{C}_4$ )                      | Toronto Research Chemicals PN: S688767   | HLB           |
| Tirlylglycine         | Toronto Research Chemicals PN: T440100 | Tirlylglycine ( $^{13}\text{C}_2,^{15}\text{N}$ )        | Toronto Research Chemicals PN: H-T440102 | MCX           |
| Trimethyluric acid    | Toronto Research Chemicals PN: T797995 | Trimethyluric acid ( $^{13}\text{C}_4,^{15}\text{N}_3$ ) | Sigma PN: 705667-5MG                     | MCX           |
| Xanthosine            | Toronto Research Chemicals PN: X742100 |                                                          |                                          | MCX           |

**Supplemental Table 2.** Internal standards.

| Internal Standard                                        | IS Stock Solvent | Working Concentration (ug/mL) |
|----------------------------------------------------------|------------------|-------------------------------|
| Adipic acid ( $^{13}\text{C}_6$ )                        | MeOH             | 25                            |
| Cinnamoylglycine ( $^2\text{H}_2$ )                      | MeOH             | 0.025                         |
| Dimethyluric acid ( $^{13}\text{C}_4,^{15}\text{N}_3$ )  | MeOH             | 10                            |
| Hippuric acid ( $^2\text{H}_5$ )                         | DMSO             | 1                             |
| Indoxyl sulfate ( $^{13}\text{C}_6$ )                    | DMSO             | 5                             |
| Isovalerylglycine ( $^2\text{H}_2$ )                     | DMSO             | 0.25                          |
| Kynurenic acid ( $^2\text{H}_5$ )                        | DMSO             | 0.5                           |
| p-Cresol sulfate ( $^2\text{H}_7$ )                      | 75%ACN/25%MeOH   | 2.5                           |
| Pyridoxic acid ( $^2\text{H}_3$ )                        | DMSO             | 0.5                           |
| Succinic acid ( $^{13}\text{C}_4$ )                      | MeOH             | 100                           |
| Tirlylglycine ( $^{13}\text{C}_2,^{15}\text{N}$ )        | MeOH             | 1                             |
| Trimethyluric acid ( $^{13}\text{C}_4,^{15}\text{N}_3$ ) | DMSO             | 10                            |

Supplemental material is neither peer-reviewed nor thoroughly edited by C/ASN. The authors alone are responsible for the accuracy and presentation of the material.

**Supplemental Table 3.** Chromatographic parameters.

|                                |                                    |
|--------------------------------|------------------------------------|
| <b>Mobile Phase A</b>          | Water + 0.2% Formic Acid           |
| <b>Mobile Phase B</b>          | 80% ACN/20%MeOH + 0.2% Formic acid |
| <b>Flow Rate</b>               | 0.4 mL/min                         |
| <b>Autosampler Temperature</b> | 7 °C                               |
| <b>Column Oven Temperature</b> | 40 °C                              |

**Supplemental Table 4.** Chromatographic program

| Time (min) | Action               |
|------------|----------------------|
| 0.00       | Divert to Waste      |
| 0.00       | 2% B                 |
| 0.25       | 2% B                 |
| 0.50       | Divert to Instrument |
| 4.85       | 25% B                |
| 4.95       | 85% B                |
| 6.25       | 85% B                |
| 6.35       | 2% B                 |
| 7.00       | Divert to Waste      |
| 10.70      | End Run              |

**Supplemental Table 5.** Mass Spectrometric Parameters (Part 1).

| Compound            | Mass (Da) | Pos/Neg Mode | Internal Standard                                         | Internal standard in urine (if different) | Retention Time (min) | Un/scheduled |
|---------------------|-----------|--------------|-----------------------------------------------------------|-------------------------------------------|----------------------|--------------|
| 3-Hydroxy hippurate | 194.9     | Neg          | Hippuric acid ( $^2\text{H}_5$ )                          |                                           | 2.1                  | Scheduled    |
| Adipic acid         | 145.9     | Neg          | Adipic acid ( $^{13}\text{C}_6$ )                         |                                           | 1.6                  | Scheduled    |
| Cinnamoylglycine    | 205.1     | Pos          | Cinnamoylglycine ( $^2\text{H}_2$ )                       |                                           | 4.4                  | Scheduled    |
| Dimethyluric acid   | 196.1     | Neg          | Dimethyluric acid ( $^{13}\text{C}_4, ^{15}\text{N}_3$ )  |                                           | 2.1                  | Scheduled    |
| Hippurate           | 179.1     | Pos          | Hippuric acid ( $^2\text{H}_5$ )                          |                                           | 2.5                  | Scheduled    |
| Indoxyl sulfate     | 213       | Neg          | Indoxyl sulfate ( $^{13}\text{C}_6$ )                     |                                           | 1.8                  | Unscheduled  |
| Isovalerylglycine   | 159.1     | Neg          | Isovalerylglycine ( $^2\text{H}_2$ )                      |                                           | 1.7                  | Scheduled    |
| Kynurenic acid      | 189.1     | Pos          | Kynurenic acid ( $^2\text{H}_5$ )                         |                                           | 3.1                  | Unscheduled  |
| Pantothenic acid    | 219       | Pos          | Pyridoxic acid ( $^2\text{H}_3$ )                         | Kynurenic acid ( $^2\text{H}_5$ )         | 1.3                  | Scheduled    |
| p-cresol-sulfate    | 188.01    | Neg          | p-Cresol sulfate ( $^2\text{H}_7$ )                       |                                           | 2.2                  | Unscheduled  |
| Pyridoxic acid      | 183.05    | Pos          | Pyridoxic acid ( $^2\text{H}_3$ )                         |                                           | 1.6                  | Scheduled    |
| Suberic acid        | 174.1     | Pos          | None                                                      |                                           | 3.6                  | Scheduled    |
| Succinic acid       | 118       | Neg          | Succinic acid ( $^{13}\text{C}_4$ )                       |                                           | 0.6                  | Scheduled    |
| Tiglylglycine       | 157       | Neg          | Tirlylglycine ( $^{13}\text{C}_2, ^{15}\text{N}$ )        |                                           | 1.6                  | Scheduled    |
| Trimethyluric acid  | 210.1     | Pos          | Trimethyluric acid ( $^{13}\text{C}_4, ^{15}\text{N}_3$ ) |                                           | 2.6                  | Scheduled    |
| Xanthosine          | 284.2     | Pos          | Pyridoxic acid ( $^2\text{H}_3$ )                         |                                           | 1.1                  | Scheduled    |

Supplemental material is neither peer-reviewed nor thoroughly edited by CJASN. The authors alone are responsible for the accuracy and presentation of the material.

**Supplemental Table 6. Mass Spectrometric Parameters (Part 2).**

| Compound            | DP  | EP  | CXP | MS1    | MS1<br>(detuned in urine) | MS3                      | CE                 |
|---------------------|-----|-----|-----|--------|---------------------------|--------------------------|--------------------|
| 3-Hydroxy hippurate | -46 | -10 | -13 | 193.9  |                           | 149.9, 92.9              | -19, -23           |
| Adipic acid         | -36 | -10 | -13 | 144.9  |                           | 126.8, 83                | -13, -16           |
| Cinnamoylglycine    | 30  | 10  | 13  | 206.1  |                           | 131.2, 103               | 16, 37             |
| Dimethyluric acid   | -45 | -10 | -13 | 195.1  |                           | 180, 109.7, 136.9        | -24, -29, -34      |
| Hippurate           | 14  | 10  | 13  | 180.1  | 181.1                     | 105, 51.1, 77, 50        | 19, 77, 43, 115    |
| Indoxyl sulfate     | -31 | -10 | -13 | 212    |                           | 132, 79.9, 80.8, 77      | -26, -24, -21, -43 |
| Isovalerylglycine   | -25 | -10 | -13 | 158.1  |                           | 113.9, 73.9              | -17, -19           |
| Kynurenic acid      | 42  | 10  | 13  | 190.1  | 191.1                     | 144.1, 89, 116.1         | 26, 52, 42         |
| Pantothenic acid    | 51  | 10  | 13  | 220    |                           | 202.1, 124.1, 184.1, 90  | 28, 16, 20, 18     |
| p-cresol-sulfate    | -29 | -10 | -13 | 188.01 | 188.01                    | 107, 79.9, 104.9, 77     | -28, -21, -44, -45 |
| Pyridoxic acid      | 31  | 10  | 13  | 184.05 |                           | 166.1, 92.1, 148.1, 65.2 | 17, 38, 28, 43     |
| Suberic acid        | 30  | 10  | 13  | 175.1  |                           | 157.2, 83.1, 111.1, 55   | 11, 15, 23, 33     |
| Succinic acid       | -21 | -10 | -13 | 117    |                           | 98.9                     | -16                |
| Tiglylglycine       | -22 | -10 | -13 | 156    |                           | 111.9, 95.8, 109.9       | -16, -21, -18      |
| Trimethyluric acid  | 94  | 10  | 13  | 211.1  |                           | 196.1, 126, 154          | 31, 25, 25         |
| Xanthosine          | 38  | 10  | 13  | 285.2  |                           | 153.1, 133, 136.1        | 15, 15, 45         |

**Supplemental Table 7. Mass Spectrometric Parameters (Part 3).**

| Internal Standard                                         | Retention Time<br>(min) | DP  | EP  | CXP | MS1   | MS3                    | CE                 |
|-----------------------------------------------------------|-------------------------|-----|-----|-----|-------|------------------------|--------------------|
| Adipic acid ( $^{13}\text{C}_6$ )                         | 1.6                     | -24 | -10 | -13 | 151   | 133, 106.1, 88, 86.1   | -17, -14, -18, -26 |
| Cinnamoylglycine ( $^2\text{H}_2$ )                       | 4.4                     | 40  | 10  | 13  | 208.1 | 131.1, 103, 77.1, 51.1 | 17, 39, 58, 87     |
| Dimethyluric acid ( $^{13}\text{C}_4, ^{15}\text{N}_3$ )  | 2.1                     | -62 | -10 | -13 | 201.1 | 186, 141.1, 112.9      | -25, -34, -30      |
| Hippuric acid ( $^2\text{H}_5$ )                          | 2.4                     | 26  | 10  | 13  | 185.1 | 110.2, 82.1, 54.1      | 19, 43, 73         |
| Indoxyl sulfate ( $^{13}\text{C}_6$ )                     | 1.8                     | -30 | -10 | -13 | 218   | 138, 110, 83.1, 80.9   | -27, -33, -41, -21 |
| Isovalerylglycine ( $^2\text{H}_2$ )                      | 1.7                     | -20 | -10 | -13 | 160.1 | 116.1, 100.1, 76       | -18, -25, -17      |
| Kynurenic acid ( $^2\text{H}_5$ )                         | 3.1                     | 38  | 10  | 13  | 195.1 | 149.2, 121.1, 94.1     | 28, 43, 53         |
| p-Cresol sulfate ( $^2\text{H}_7$ )                       | 2.1                     | -30 | -10 | -13 | 194.1 | 114, 112.1, 110, 79.9  | -28, -47, -50, -24 |
| Pyridoxic acid ( $^2\text{H}_3$ )                         | 1.6                     | 34  | 10  | 13  | 187.2 | 150.1, 141.1, 94, 67   | 30, 31, 40, 45     |
| Succinic acid ( $^{13}\text{C}_4$ )                       | 0.6                     | -15 | -10 | -13 | 120.9 | 103, 76.1, 57.9        | -15, -16, -19      |
| Tirlylglycine ( $^{13}\text{C}_2, ^{15}\text{N}$ )        | 1.6                     | -18 | -10 | -13 | 159.1 | 114, 112, 98, 77       | -16, -18, -21, -15 |
| Trimethyluric acid ( $^{13}\text{C}_6, ^{15}\text{N}_3$ ) | 2.6                     | 18  | 10  | 13  | 218.2 | 203.2, 130.1           | 28, 28             |

Supplemental material is neither peer-reviewed nor thoroughly edited by CJASN. The authors alone are responsible for the accuracy and presentation of the material.

**Supplemental Table 8.** Pamoic acid internal NMR standard integrals and assignments.

| Proton chemical shift range | Integrated Area | Number of protons |
|-----------------------------|-----------------|-------------------|
| <b>8.698 to 8.344</b>       | 2.0             | 2                 |
| <b>8.344 to 8.002</b>       | 2.044           | 2                 |
| <b>8.002 to 7.741</b>       | 1.9882          | 2                 |
| <b>7.493 to 7.110</b>       | 3.9668          | 4                 |

**Supplemental Table 9.** Limits of quantification for each analyte.

| Compound (endogenous)            | Serum LLOQ (ng/mL) | Urine LLOQ (ng/mL) | Serum ULOQ | Average $r^2$ (serum) <sup>d</sup> | Urine ULOQ | Average $r^2$ (urine) <sup>d</sup> |
|----------------------------------|--------------------|--------------------|------------|------------------------------------|------------|------------------------------------|
| 3-Hydroxy hippurate <sup>a</sup> | 0.96               | 116                | 415        | 0.9892                             | 284639     | 0.9951                             |
| Adipic acid <sup>a</sup>         | ND                 | 730                | 3428       | 0.9898                             | 29056      | 0.9899                             |
| Cinnamoylglycine <sup>a</sup>    | 0.22               | 0.67               | 156        | 0.9905                             | 1088       | 0.9958                             |
| Dimethyluric acid <sup>d</sup>   | 0.23               | 26                 | 336        | 0.9945                             | 144413     | 0.9887                             |
| Hippurate <sup>a</sup>           | 9.5                | 380                | 2559       | 0.9844                             | 1169664    | 0.9938                             |
| Indoxyl sulfate <sup>a</sup>     | 9.1                | 330                | 10517      | 0.9897                             | 969097     | 0.9913                             |
| Isovalerylglycine <sup>b</sup>   | 0.55               | 16                 | 75         | 0.9967                             | 20049      | 0.9849                             |
| Kynurenic acid <sup>a</sup>      | 0.70               | 6.7                | 309        | 0.9986                             | 124985     | 0.9938                             |
| Pantothenic acid <sup>a</sup>    | 6.3                | 114                | 2191       | 0.9976                             | 13288      | 0.9842                             |
| p-cresol-sulfate <sup>a</sup>    | 29                 | 49                 | 38217      | 0.9896                             | 104148     | 0.8875                             |
| Pyridoxic acid <sup>a</sup>      | 1.5                | 21                 | 480        | 0.9951                             | 50291      | 0.9359                             |
| Suberic acid <sup>a</sup>        | ND                 | 631                | 3172       | 0.9798                             | 55909      | 0.9807                             |
| Succinic acid <sup>a</sup>       | ND                 | 2397               | 107158     | 0.9988                             | 22247      | 0.9521                             |
| Tiglylglycine <sup>c</sup>       | 0.55               | 15                 | 169        | 0.9984                             | 58664      | 0.9980                             |
| Trimethyluric acid <sup>a</sup>  | 0.22               | 8.0                | 123        | 0.9979                             | 18647      | 0.9791                             |
| Xanthosine <sup>a</sup>          | 0.31               | 2.4                | 329        | 0.9975                             | 5009       | 0.9783                             |

<sup>a</sup> Plasma diluted with MSG3000.

<sup>b</sup> Plasma diluted with 30% bovine serum albumin.

<sup>c</sup> Plasma diluted with saline.

<sup>d</sup> Pearson correlation coefficient of the standard addition experiment in each single point calibrator.

ND: Not determined due to isobaric interference in dilution matrices.

Supplemental material is neither peer-reviewed nor thoroughly edited by CJASN. The authors alone are responsible for the accuracy and presentation of the material.

**Supplemental Table 10.** Recoveries in different matrices.

|                            | Lipemic | Hemolysis | Low total protein | High total protein |
|----------------------------|---------|-----------|-------------------|--------------------|
| <b>3-Hydroxy hippurate</b> | 116%    | 102%      | 93%               | 72%                |
| <b>Adipic acid</b>         | 96%     | 124%      | 102%              | 119%               |
| <b>Cinnamoylglycine</b>    | 112%    | 118%      | 112%              | 118%               |
| <b>Dimethyluric acid</b>   | 104%    | 108%      | 109%              | 101%               |
| <b>Hippurate</b>           | 116%    | 117%      | 104%              | 98%                |
| <b>Indoxyl sulfate</b>     | 109%    | 118%      | 106%              | 94%                |
| <b>Isovalerylglycine</b>   | 111%    | 123%      | 114%              | 130%               |
| <b>Kynurenic acid</b>      | 112%    | 122%      | 109%              | 117%               |
| <b>Pantothenic acid</b>    | 106%    | 112%      | 108%              | 126%               |
| <b>p-cresol-sulfate</b>    | 109%    | 114%      | 104%              | 94%                |
| <b>Pyridoxic acid</b>      | 108%    | 112%      | 106%              | 116%               |
| <b>Suberic acid</b>        | 98%     | 117%      | 110%              | 96%                |
| <b>Succinic acid</b>       | 109%    | 116%      | 108%              | 123%               |
| <b>Tiglylglycine</b>       | 111%    | 118%      | 115%              | 124%               |
| <b>Trimethyluric acid</b>  | 88%     | 55%       | 92%               | 108%               |
| <b>Xanthosine</b>          | 99%     | 120%      | 113%              | 100%               |



Supplemental material is neither peer-reviewed nor thoroughly edited by CJASN. The authors alone are responsible for the accuracy and presentation of the material.

**Supplemental Table 11. Detection limits, laboratory variability and characteristics of candidate secretory solutes.<sup>a</sup>**

|                    | Molecular weight<br>(g/mol) | Plasma LLQ<br>(ng/mL) | Urine LLQ<br>(ng/mL) | Intra-assay CV plasma<br>(%) | Inter-assay CV plasma<br>(%) | Intra-assay CV urine<br>(%) | Inter-assay CV urine<br>(%) | Protein binding % <sup>a</sup> | Predicted pKa <sup>c</sup> |
|--------------------|-----------------------------|-----------------------|----------------------|------------------------------|------------------------------|-----------------------------|-----------------------------|--------------------------------|----------------------------|
| Cinnamoylglycine   | 205                         | 0.2                   | 0.7                  | 4.5                          | 5.4                          | 4.9                         | 4.5                         | 94.9                           | 3.90                       |
| Hippurate          | 179                         | 9.5                   | 380                  | 3.8                          | 5.1                          | 5.4                         | 4.7                         | 65.7                           | 3.59                       |
| Indoxyl sulfate    | 213                         | 9.1                   | 330                  | 4.3                          | 6.0                          | 6.1                         | 9.4                         | 92.9                           | 7.32                       |
| Isovalerylglycine  | 159                         | 0.6                   | 16                   | 7.1                          | 7.3                          | 5.4                         | 5.9                         | ND <sup>b</sup>                | 4.17                       |
| Kynurenic acid     | 189                         | 0.7                   | 6.7                  | 4.1                          | 5.5                          | 5.6                         | 8.6                         | 97.0                           | 2.47                       |
| p-cresol sulfate   | 188                         | 29.0                  | 49                   | 3.9                          | 5.2                          | 5.6                         | 5.2                         | 88.5                           | -2.04                      |
| Pyridoxic acid     | 183                         | 1.5                   | 21                   | 3.4                          | 4.7                          | 5.7                         | 5.8                         | 80.2                           | 2.55                       |
| Dimethyluric acid  | 196                         | 0.2                   | 26                   | 4.5                          | 5.4                          | 4.9                         | 4.5                         | 63.6                           | 7.74                       |
| Trimethyluric acid | 210                         | 0.2                   | 15                   | 7.1                          | 7.4                          | 7.8                         | 7.8                         | 58.8                           | 8.46                       |
| Tiglylglycine      | 157                         | 0.6                   | 15                   | 7.0                          | 14.7                         | 6.0                         | 5.5                         | 18.3                           | 4.09                       |
| Xanthosine         | 284                         | 0.3                   | 2.4                  | 11.1                         | 14.5                         | 9.8                         | 10.1                        | 29.5                           | 9.03                       |

<sup>a</sup>To evaluate the extent of protein binding, we performed ultrafiltration experiments. Briefly, plasma was filtered using a centrifugal filter (Amicon Ultra, 3kD MWCO) at 11,200xg for 30 minutes at room temperature. The concentration of solutes in the filtrate was then determined using the same method as for plasma and compared with the concentration of solutes in unfiltered plasma. The proportion of the solutes in the filtrate was assumed to be unbound in plasma. Preliminary experiments were performed to confirm that observed differences between the filtrate and unfiltered plasma could not be attributed to adsorption to the Amicon Ultra filtration units (data not shown).

<sup>b</sup> Protein binding not detected

<sup>c</sup> pKa predicted based on chemical structures. Data from the Chemicalize database (ChemAxon, Budapest, Hungary).

Supplemental material is neither peer-reviewed nor thoroughly edited by CJASN. The authors alone are responsible for the accuracy and presentation of the material.

**Supplemental Table 12. Serum or plasma solute concentrations by cohort**

| Solute            | ADPKD ≥ 90                          |                  |                      | ADPKD < 90                          |                     |                      |
|-------------------|-------------------------------------|------------------|----------------------|-------------------------------------|---------------------|----------------------|
|                   | mL/min/1.73m <sup>2</sup><br>(n=31) | Healthy (n=25)   | p-value <sup>1</sup> | mL/min/1.73m <sup>2</sup><br>(n=95) | CKD (n=92)          | p-value <sup>1</sup> |
| Cinnamoylglycine  | 16.7 (8.5, 24.4)                    | 8.1 (4.5, 14.1)  | 0.03                 | 16.9 (5.5, 55.9)                    | 14.5 (8.5, 24.7)    | <0.001*              |
| Dimethyluric acid | 9.7 (2.9, 27.5)                     | 14.6 (3.2, 18.8) | 0.96                 | 17.6 (4.1, 49.3)                    | 20.7 (7.2, 47.4)    | 0.09                 |
| Hippurate         | 531 (239, 946)                      | 635 (424, 892)   | 0.21                 | 790 (454, 1466)                     | 526 (295, 1022)     | 0.24                 |
| Indoxyl sulfate   | 738 (549, 1021)                     | 455 (314, 656)   | 0.007                | 1615 (1060, 2334)                   | 1981 (1073, 2021)   | 0.06                 |
| Isovalerylglycine | 3.8 (2.5, 4.7)                      | 5.6 (3.7, 6.3)   | 0.04                 | 6.7 (4.9, 9.7)                      | 5.7 (4.4, 7.5)      | 0.001*               |
| Kynurenic acid    | 8.8 (6.6, 11.4)                     | 9.1 (8.3, 10.6)  | 0.37                 | 15.2 (11.3, 26.6)                   | 14.1 (10.6, 21.7)   | 0.43                 |
| P-cresol sulfate  | 2846 (1434, 3620)                   | 1942 (860, 3736) | 0.33                 | 5646 (3521, 9650)                   | 8990 (5255, 15,618) | <0.001*              |
| Pyridoxic acid    | 5.3 (3.9, 10.2)                     | 4.7 (4.1, 6.2)   | 0.38                 | 12.5 (7.0, 31.5)                    | 13.3 (8.2, 23.9)    | 0.78                 |
| Tiglylglycine     | 4.3 (2.8, 6.1)                      | 3.6 (2.6, 4.5)   | 0.13                 | 8.4 (5.8, 14.8)                     | 6.8 (4.8, 10.2)     | 0.02*                |
| Trimethyluricacid | 0.5 (0.3, 1.1)                      | 0.9 (0.3, 1.7)   | 0.38                 | 0.81 (0.30, 2.17)                   | 1.50 (0.65, 3.03)   | 0.003*               |
| Xanthosine        | 28.7 (10.3, 81.2)                   | 3.1 (2.9, 3.9)   | <0.001*              | 47.8 (21.6, 87.6)                   | 17.6 (11.4, 33.4)   | <0.001*              |

Entries are mean (SD). Plasma units are in ng/mL

<sup>1</sup>Adjusted for eGFRCKD-EPI

\*Denotes statistical significance at p <0.0045

Supplemental material is neither peer-reviewed nor thoroughly edited by CJASN. The authors alone are responsible for the accuracy and presentation of the material.

**Supplemental Table 13. Urine concentrations by cohort**

| Solute            | ADPKD ≥ 90                       |                           |                      | ADPKD < 90                       |                           |                      |
|-------------------|----------------------------------|---------------------------|----------------------|----------------------------------|---------------------------|----------------------|
|                   | mL/min/1.73m <sup>2</sup> (n=31) | Healthy (n=25)            | p-value <sup>1</sup> | mL/min/1.73m <sup>2</sup> (n=95) | CKD (n=92)                | p-value <sup>1</sup> |
| Cinnamoylglycine  | 546 (150, 1589)                  | 664 (182, 1125)           | 0.48                 | 504 (93, 1495)                   | 604 (148, 1506)           | 0.34                 |
| Dimethyluric acid | 3490 (842, 8308)                 | 2850 (1622, 5171)         | 0.93                 | 3042 (649, 7610)                 | 6434 (1742, 15,848)       | 0.002*               |
| Hippurate         | 103,603 (42,165, 206,537)        | 153,059 (94,476, 225,132) | 0.27                 | 103,801 (50,073, 188,045)        | 174,672 (98,896, 324,408) | <0.001*              |
| Indoxyl sulfate   | 22,817 (9888, 42,243)            | 10,495 (8554, 16,662)     | 0.01*                | 28,343 (13,635, 51,462)          | 36,650 (23,424, 52,671)   | 0.37                 |
| Isovalerylglycine | 794 (279, 1336)                  | 1109 (562, 1444)          | 0.19                 | 645 (379, 1170)                  | 1021 (602, 1628)          | 0.005                |
| Kynurenic acid    | 1017 (481, 2249)                 | 468 (374, 747)            | 0.001*               | 1016 (629, 1712)                 | 1020 (615, 1405)          | 0.18                 |
| P-cresol sulfate  | 18,266 (8454, 35,863)            | 11,722 (6073, 28,504)     | 0.12                 | 29,339 (9528, 53,333)            | 68,673 (29,058, 102,931)  | 0.001*               |
| Pyridoxic acid    | 2141 (1113, 6031)                | 1728 (1219, 2409)         | 0.6                  | 2799 (1399, 5628)                | 4193 (2301, 10,850)       | 0.03                 |
| Tiglylglycine     | 659 (251, 1249)                  | 588 (381, 1121)           | 0.59                 | 576 (362, 1001)                  | 962 (599, 1349)           | 0.005                |
| Trimethyluricacid | 85 (28, 204)                     | 131 (64, 302)             | 0.29                 | 60 (19, 176)                     | 185 (72, 445)             | 0.014                |
| Xanthosine        | 359 (219, 618)                   | 284 (212, 430)            | 0.19                 | 372 (229, 715)                   | 632 (406, 1290)           | 0.007                |

Entries are mean (SD). Urine concentration units are in ng/mL

<sup>1</sup>Adjusted for eGFRCKD-EPI

\*Denotes statistical significance at p <0.0045
